# Supplementary material for: An S-scheme α-Fe2O3/Cu2O photocatalyst for an enhanced primary amine oxidative coupling reaction under visible light
Source: Royal Society of Chemistry journal article supplement (doi:10.1039/d2dt00646d), 2022-01-01
Supplement: d2dt00646d1.pdf [file d2dt00646d1.pdf]

## S-scheme $\alpha$ -Fe<sub>2</sub>O<sub>3</sub>/Cu<sub>2</sub>O photocatalyst for enhanced primary amine oxidative coupling reaction under visible light

Zhen Li<sup>a,b,1</sup>, Shan Ye<sup>a,1</sup>, Ping Qiu<sup>a</sup>, Xiaoyuan Liao<sup>a</sup>, Yue Yao<sup>a</sup>, Jingzhao Zhang<sup>c</sup>, Yan Jiang<sup>a</sup> and Shuxiang

Lu<sup>a,b,\*</sup>

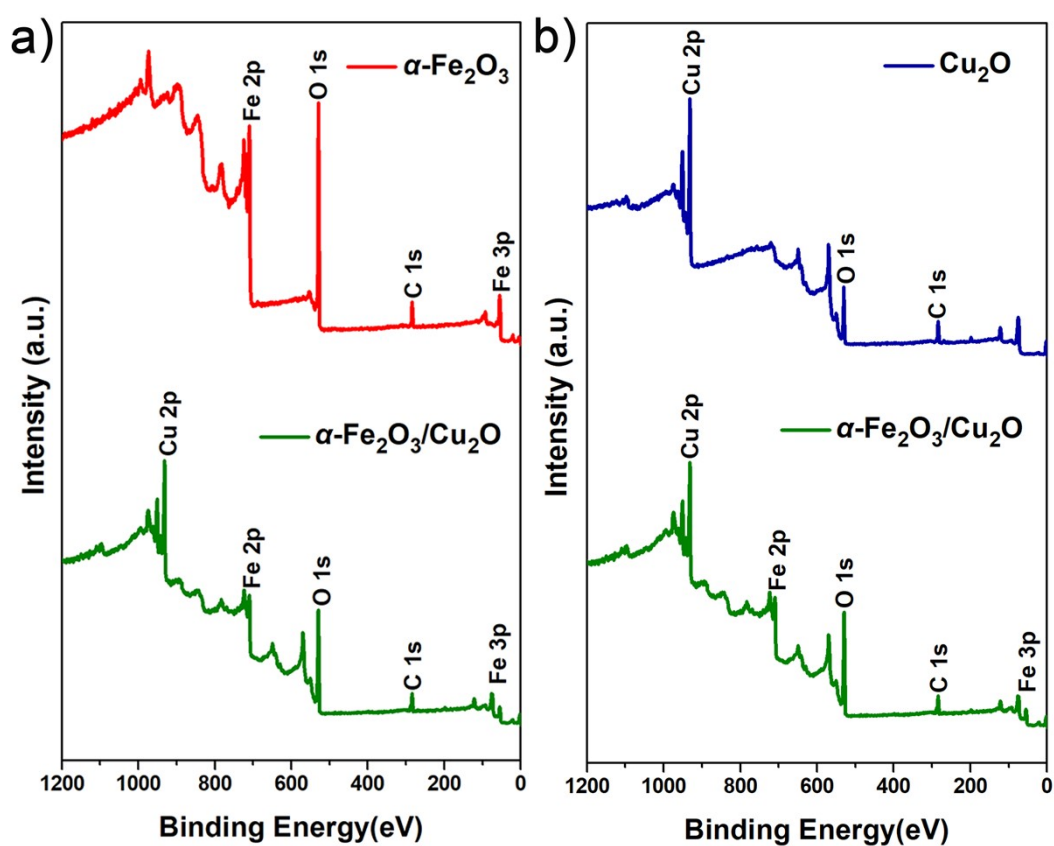

Fig. S1 Survey of XPS.

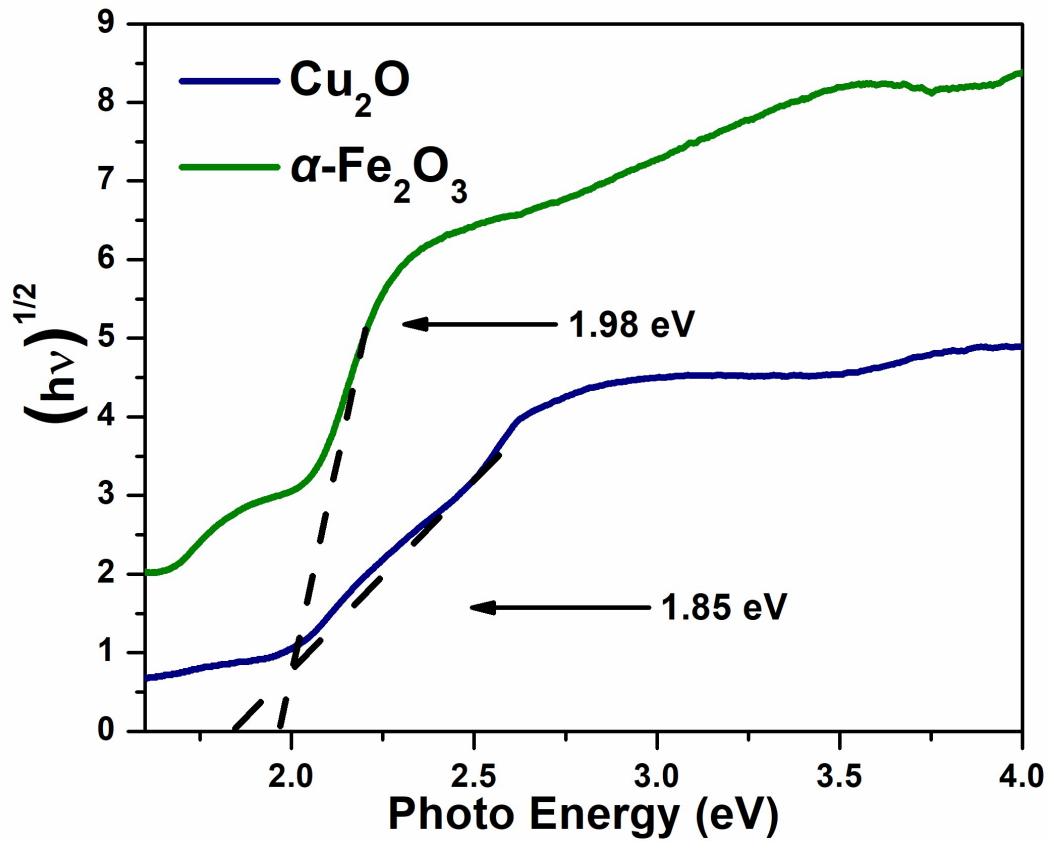

Fig. S2 Estimated band gaps of pure  $\text{Cu}_2\text{O}$  and  $\alpha\text{-Fe}_2\text{O}_3$ .

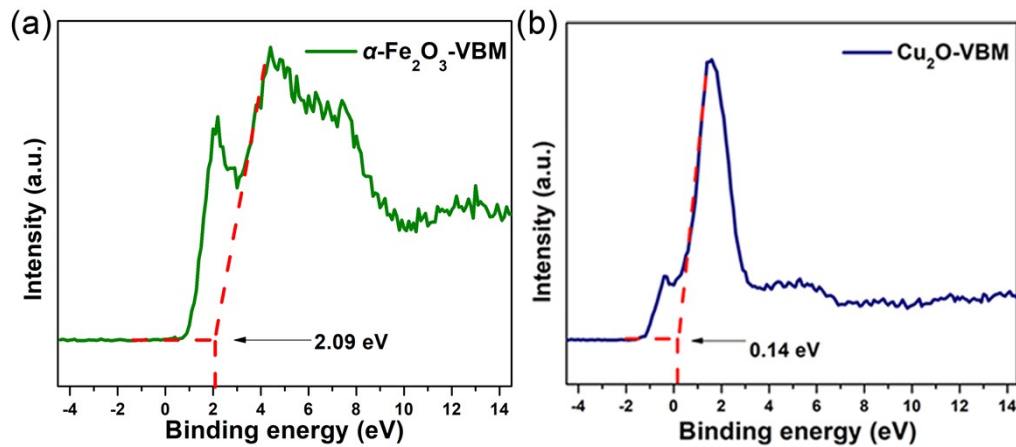

Fig. S3. Valence-band XPS spectra of pure  $\alpha\text{-Fe}_2\text{O}_3$  (a) and  $\text{Cu}_2\text{O}$  (b).

The transfer process of electron-hole pairs is further determined by analyzing the band positions of  $\alpha\text{-Fe}_2\text{O}_3$  and  $\text{Cu}_2\text{O}$  semiconductors. Fig. S2 is the K-M function calculation of the UV-Vis diffuse reflectance spectra of pure  $\alpha\text{-Fe}_2\text{O}_3$  and  $\text{Cu}_2\text{O}$ . In the figure, the intercept between the tangent line and the abscissa is the semiconductor band gap ( $E_g$ ). The band gaps of  $\alpha\text{-Fe}_2\text{O}_3$  and  $\text{Cu}_2\text{O}$  are 1.98 eV and 1.85 eV, respectively.

From Fig. S3a and S3b, the valence band potential can be estimated to be 2.09 and 0.14 eV<sup>[1,2]</sup>, and combined with the band gap results, the conduction band potential can be obtained to be 0.11 and -1.71 eV, respectively, using the band gap formula ( $E_g = E_{\text{VB}} - E_{\text{CB}}$ ). It can be clearly seen that the energy of  $\alpha\text{-Fe}_2\text{O}_3$  and  $\text{Cu}_2\text{O}$  overlap, so they can form an effective Z-scheme structure.

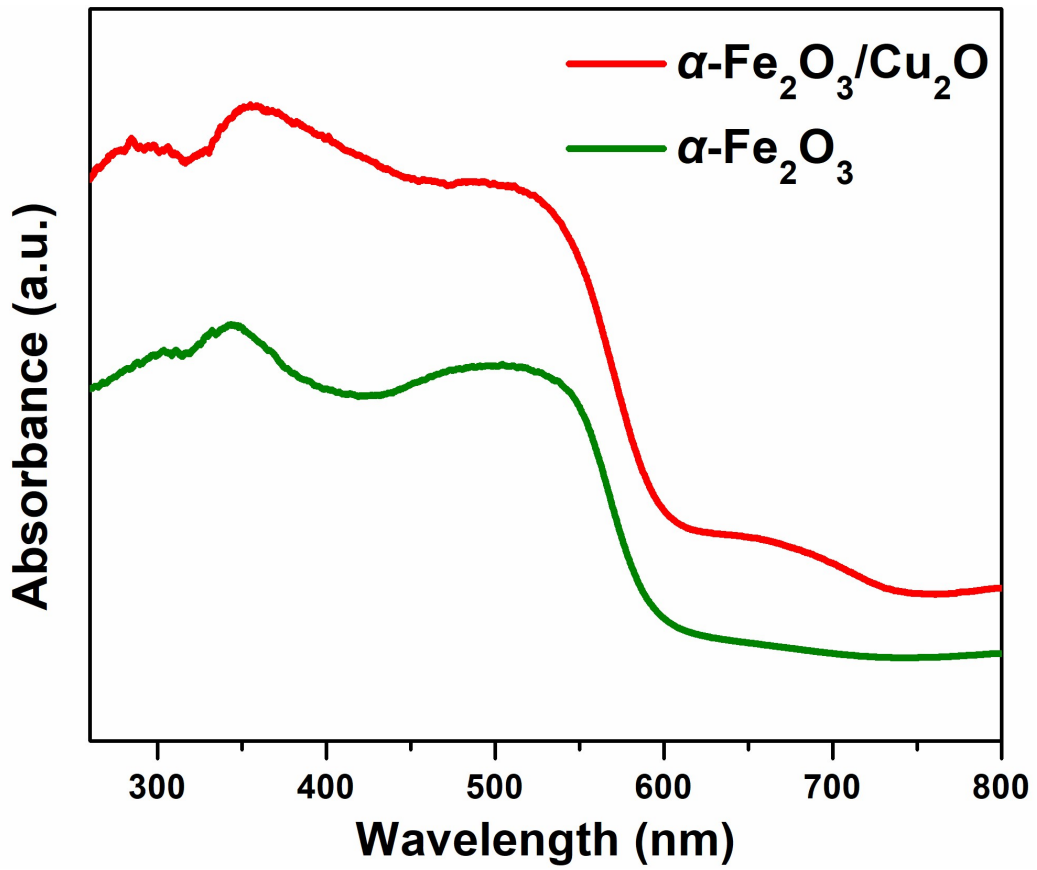

Fig. S4 UV-vis diffuse reflectance spectra of  $\alpha\text{-Fe}_2\text{O}_3$  and  $\alpha\text{-Fe}_2\text{O}_3/\text{Cu}_2\text{O}$  composite.

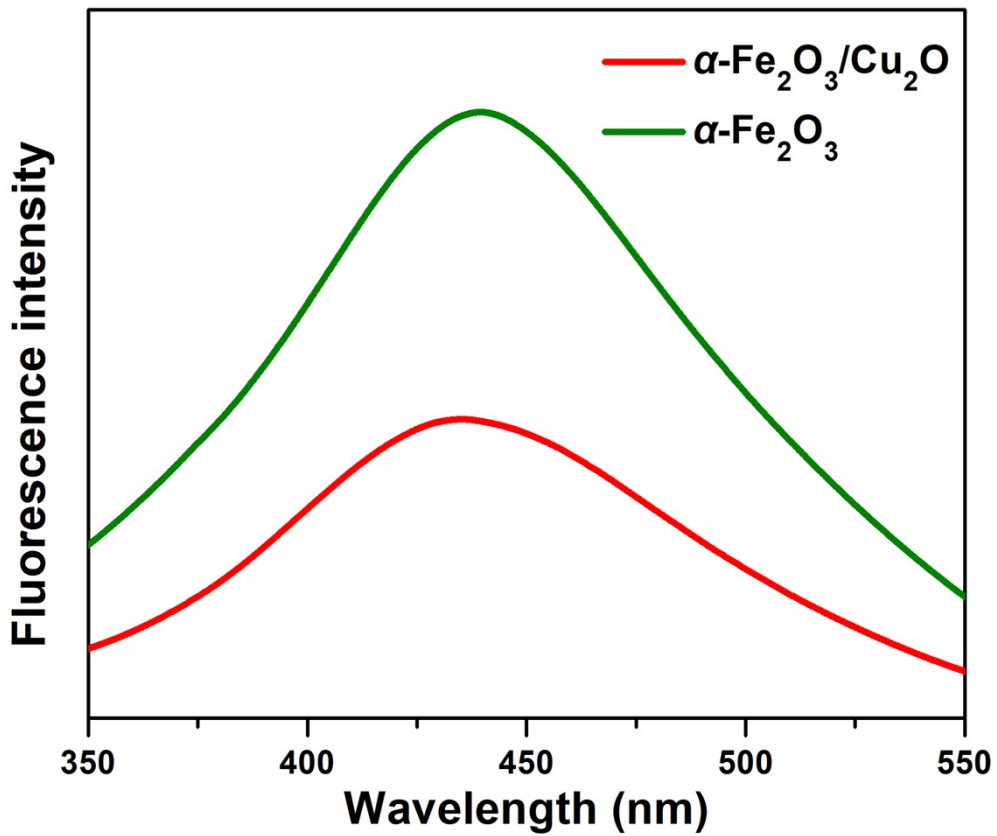

Fig. S5 PL spectra of  $\alpha\text{-Fe}_2\text{O}_3$  and  $\alpha\text{-Fe}_2\text{O}_3/\text{Cu}_2\text{O}$  composite.

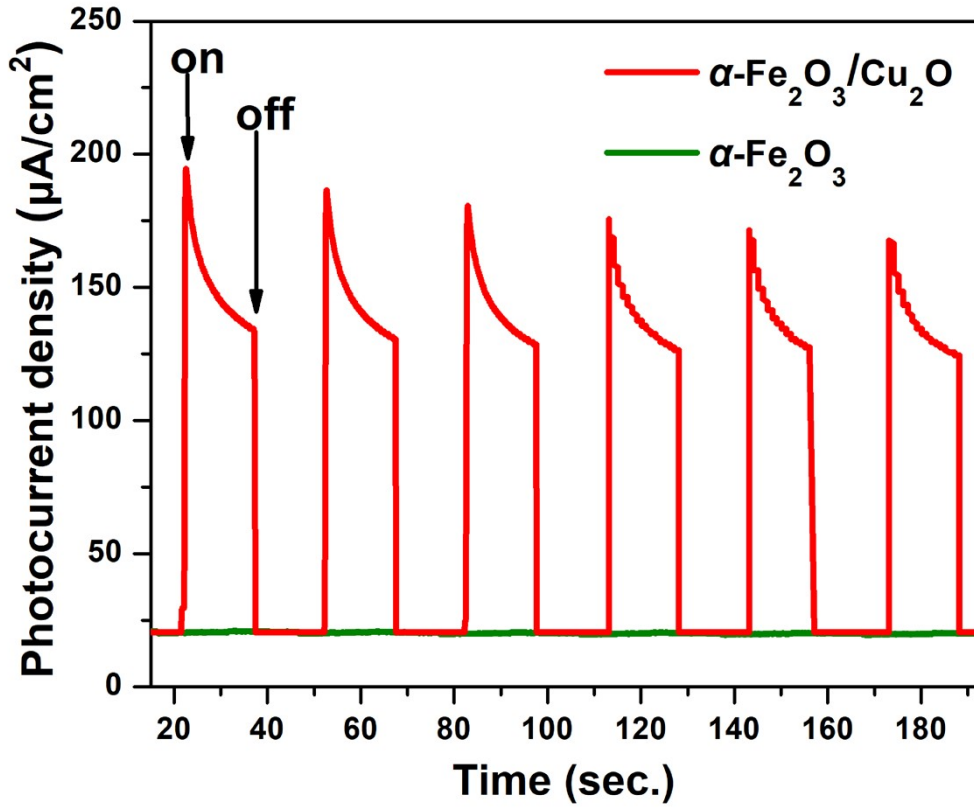

Fig. S6 Transient photocurrent density of  $\alpha\text{-Fe}_2\text{O}_3$  and  $\alpha\text{-Fe}_2\text{O}_3/\text{Cu}_2\text{O}$  composite.

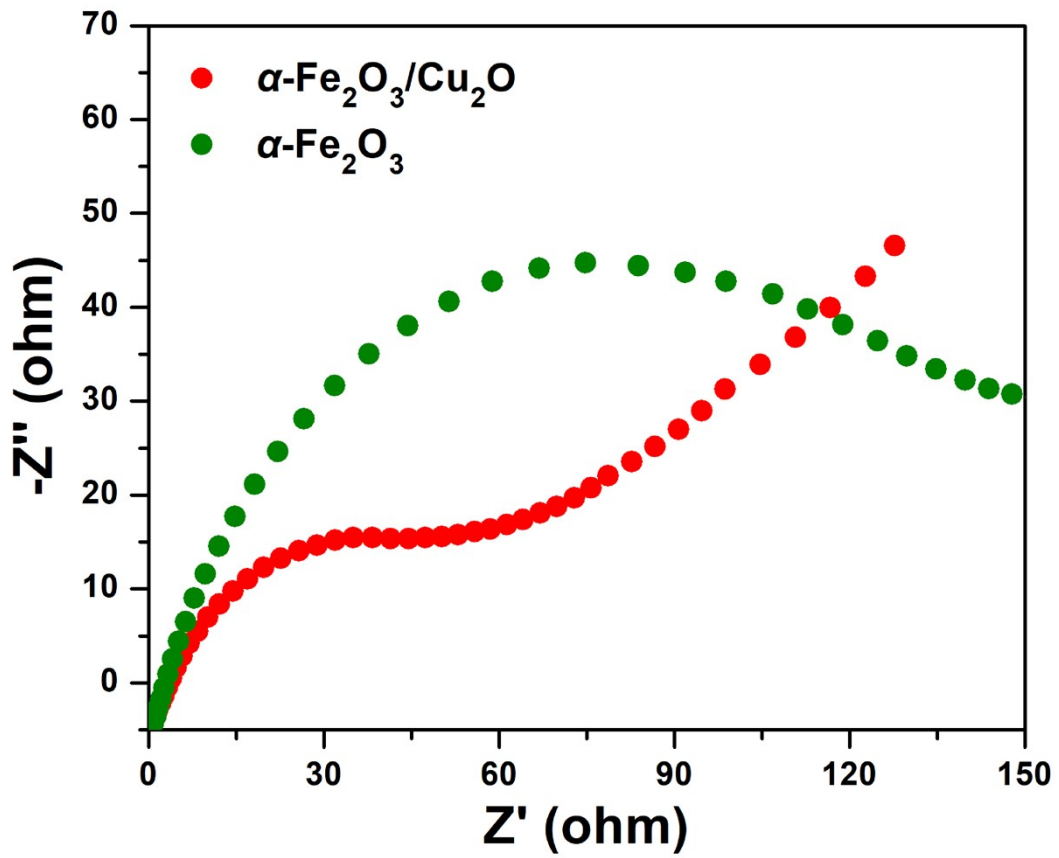

Fig. S7 EIS Nyquist plots of  $\alpha\text{-Fe}_2\text{O}_3$  and  $\alpha\text{-Fe}_2\text{O}_3/\text{Cu}_2\text{O}$  composite.

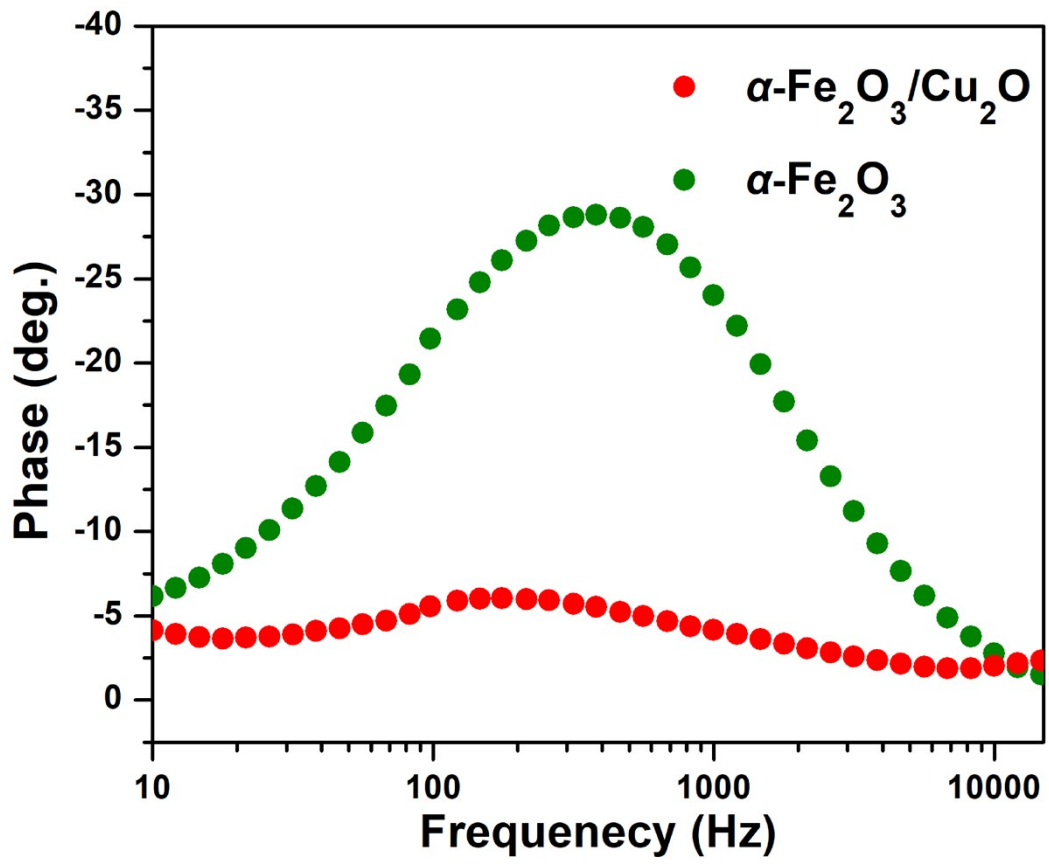

Fig. S8 Bode phase plots of  $\alpha\text{-Fe}_2\text{O}_3$  and  $\alpha\text{-Fe}_2\text{O}_3/\text{Cu}_2\text{O}$  composite.

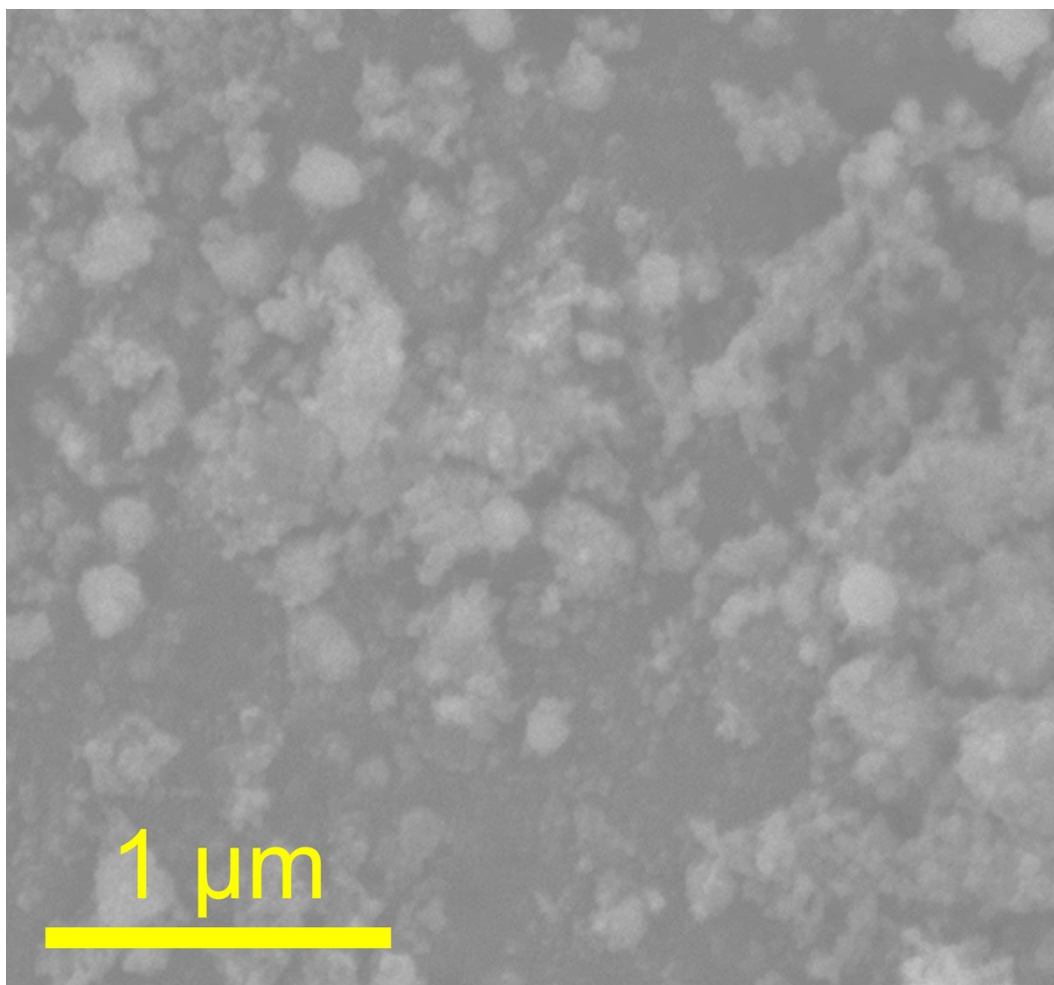

Fig. S9 SEM of  $\alpha$ -Fe<sub>2</sub>O<sub>3</sub>/Cu<sub>2</sub>O composite after the photocatalytic reactions.

Table S1. Oxidative coupling of primary amines with electron-withdrawing group in  $\alpha$ -Fe<sub>2</sub>O<sub>3</sub>/Cu<sub>2</sub>O

| Entry | Substrate | Product | Yield [%] | Selectivity [%] |
|-------|-----------|---------|-----------|-----------------|
| 1     |           |         | 35.8      | 48.5            |
| 2     |           |         | 32.3      | 39.4            |
| 3     |           |         | 29.1      | 33.4            |
| 4     |           |         | 29.1      | 40.9            |

Table S2. The catalytic activity of photocatalyst in benzylamine oxidation coupled with hydrogen production

| Entry | catalyst                                           | Yield [%] | Selectivity [%] | H <sub>2</sub> rate [ $\mu\text{mol g}^{-1} \text{h}^{-1}$ ] |
|-------|----------------------------------------------------|-----------|-----------------|--------------------------------------------------------------|
| 1     | $\alpha\text{-Fe}_2\text{O}_3/\text{Cu}_2\text{O}$ | 69.3      | 89.7            | 1.2                                                          |
| 2     | no catalyst                                        | 5.8       | 10.3            | 0.1                                                          |
| 3     | dark                                               | 4.9       | 8.7             | 0.1                                                          |
| 4     | $\alpha\text{-Fe}_2\text{O}_3$                     | 9.8       | 16.8            | 0.3                                                          |
| 5     | $\text{Cu}_2\text{O}$                              | 19.1      | 30.4            | 0.5                                                          |

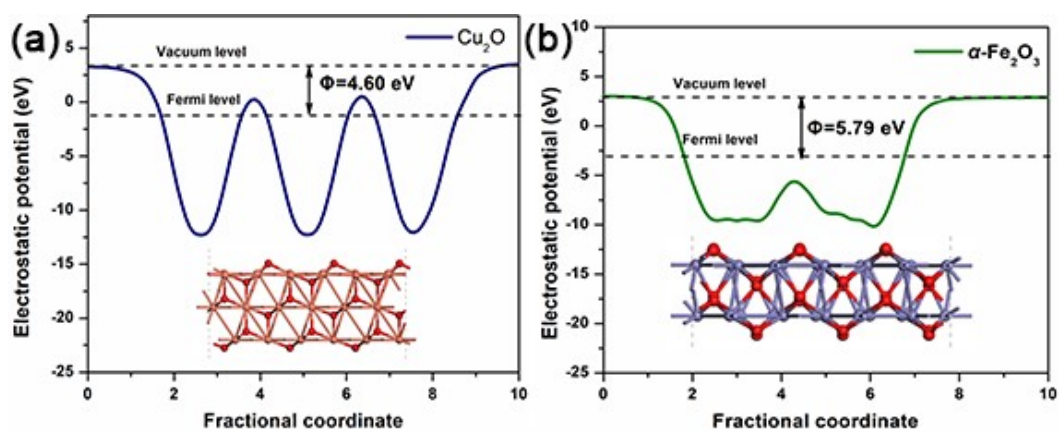

Fig. S10 DFT calculation results of  $\alpha\text{-Fe}_2\text{O}_3$  and  $\text{Cu}_2\text{O}$

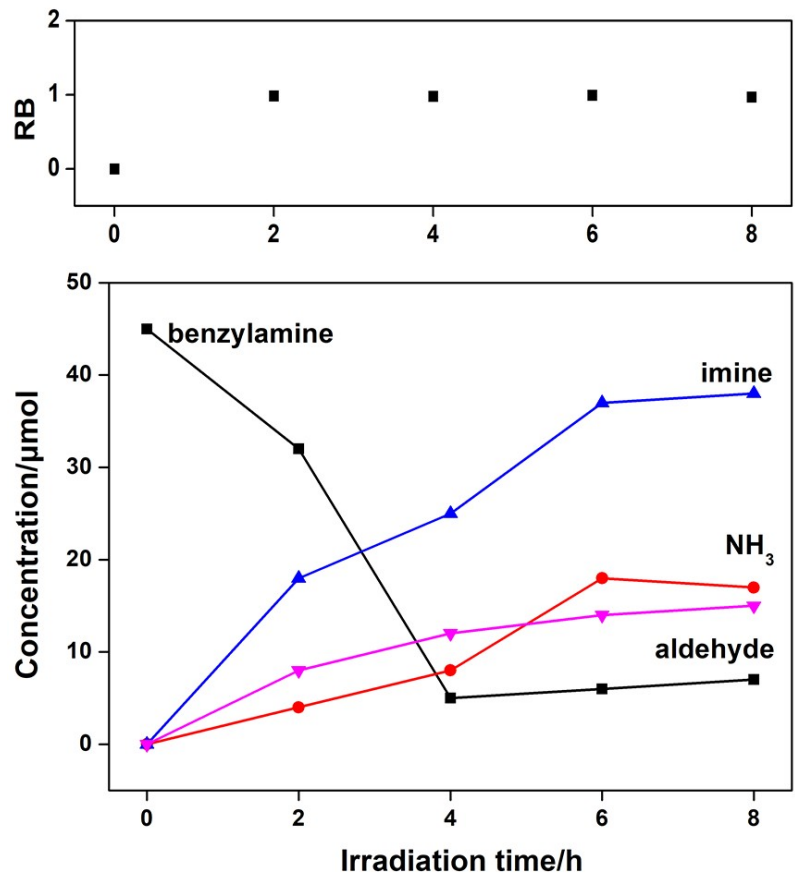

Fig. S11 Redox exploration diagram of primary amine oxidative coupling reaction<sup>[3]</sup>

Table S3. The AQE of  $\alpha$ -Fe<sub>2</sub>O<sub>3</sub>/Cu<sub>2</sub>O under different light irradiation

| Wavelength (nm) | AQE (%) |
|-----------------|---------|
| 450 nm          | 0.134   |
| 520 nm          | 0.124   |
| 600 nm          | 0.123   |

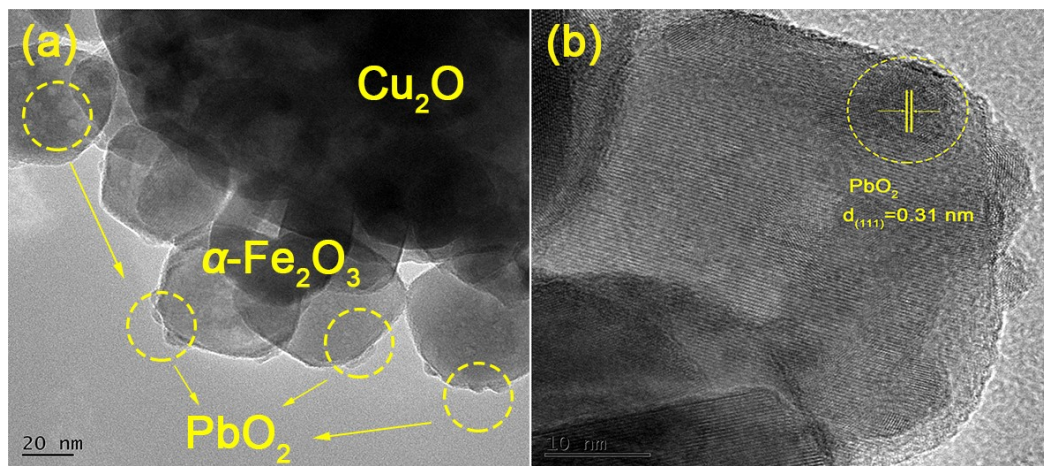

Fig. S12 The TEM of photodeposition of composite materials<sup>[4]</sup>



Table S4. Effect of different particle sizes on oxidative coupling reaction of primary amine

| Entry | Size (nm) | Yield [%] | Selectivity [%] |
|-------|-----------|-----------|-----------------|
| 1     | 300       | 69.3      | 89.7            |
| 2     | 400       | 53.8      | 72.3            |

Table S5. Effects of different light intensities on oxidative coupling of primary amines

| Entry | Power [W] | Yield [%] | Selectivity [%] |
|-------|-----------|-----------|-----------------|
| 1     | 5         | 3.4       | 10.2            |
| 2     | 20        | 46.7      | 67.2            |
| 3     | 50        | 69.3      | 89.7            |

## References

- [1] D. Zhu and Q. Zhou, *Appl. Catal. B-Environ.*, 2019, **19**, 118426-118436.
- [2] J. Liu, W. Lu, Q. Zhong, X. Jin, L. Wei, H. Wu, X. Zhang, L. Li and Z. Wang, *Mol. Catal.*, 2017, **433**, 354-362.
- [3] M. Fukui, A. Tanaka, H. Kominami, *ChemCatChem*, 2020, **12**, 3298-3305.
- [4] Y. Peng, A. Rendón-Patiño, A. Franconetti, J. Albero, A. Primo, H. García, *ACS Appl. Energ. Mater.*, 2020, **3**, 6623-6632.
